# Supplementary material for: Diversity of microglial transcriptional responses during opioid exposure and neuropathic pain
Source: PubMed Central journal article supplement — Pain. 2024 Jul 30;165(11):2615–28. doi: 10.1097/j.pain.0000000000003275 (PMC11474913; doi:10.1097/j.pain.0000000000003275), 2024-07-30
Supplement: jop-165-2615-s001.pdf [file jop-165-2615-s001.pdf]

## Supplementary Materials

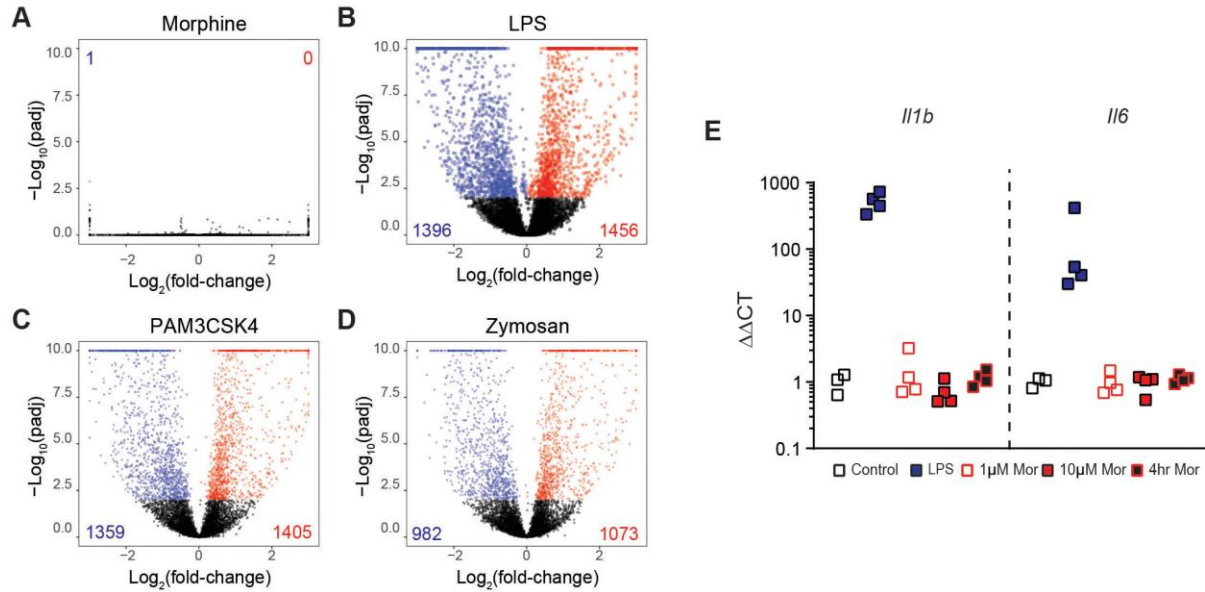

**Figure S1: Morphine treatment differs from TLR agonism in cultured microglia.**

(A-D) Volcano plots summarizing gene expression changes in cultured rat cortical microglia after 24 hours of treatment with 1  $\mu$ M morphine (A), LPS (1 ng/mL) (B), PAM3CSK4 (1 ng/mL) (C), or Zymosan (100  $\mu$ g/mL) (D). Blue and red symbols indicate significantly downregulated or upregulated genes, respectively, from DESeq2 ( $\text{padj} < 0.01$ ). The numbers in the lower corners indicate the total numbers of downregulated (blue) and upregulated (red) genes at  $\text{padj} < 0.01$ .

(E) qPCR for Il1b and Il6 24 hours after LPS (1 ng/mL) or morphine (1 or 10  $\mu$ M) exposure and 4 hours after 10  $\mu$ M morphine.

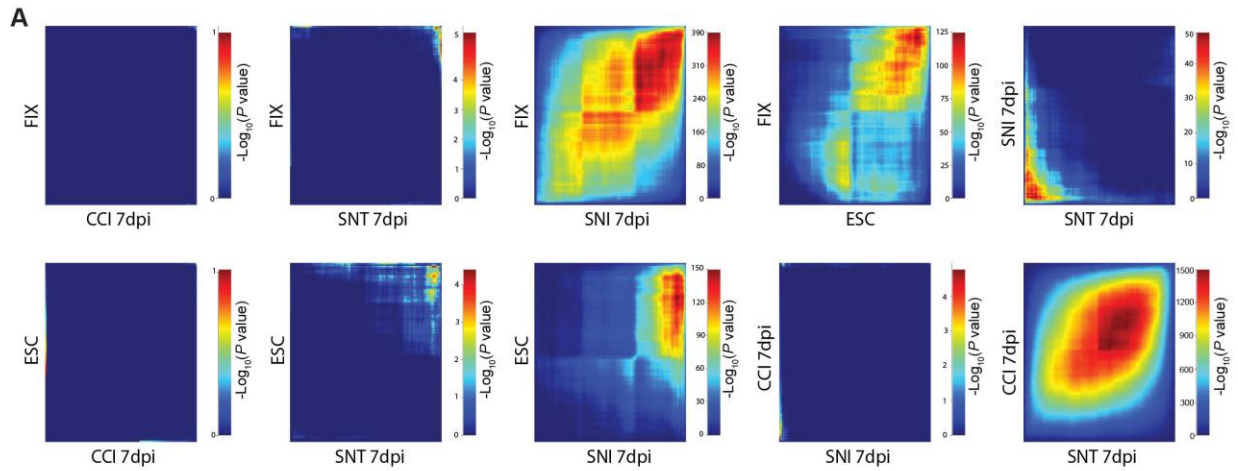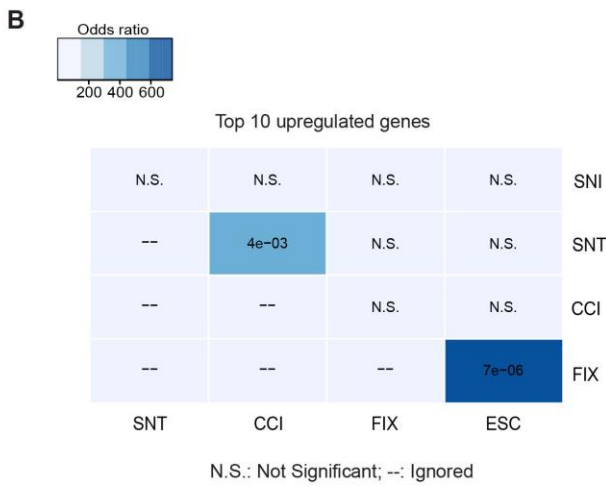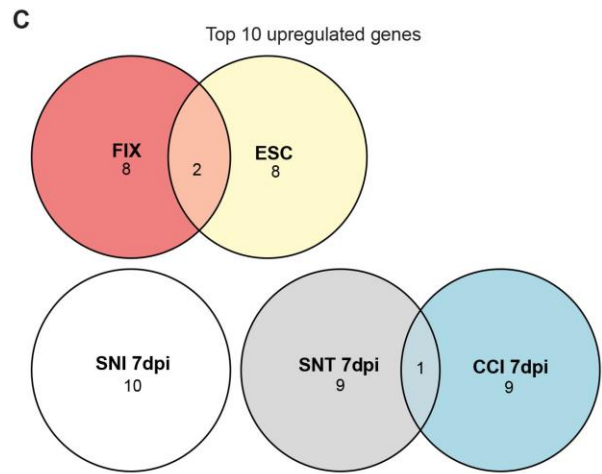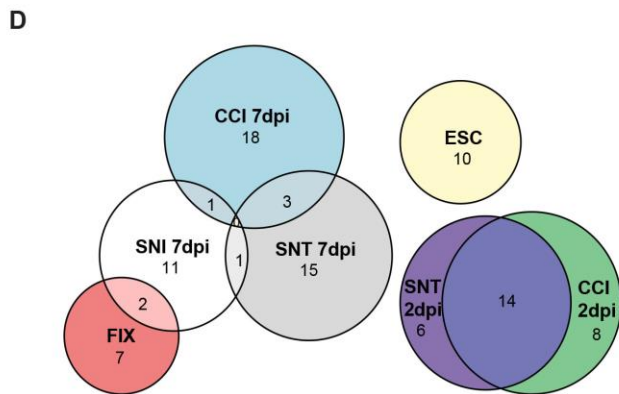

**Figure S2: Hypergeometric analysis shows little overlap between injury and morphine conditions.**

(A) Heatmaps of the RRHO analysis showing threshold-free comparisons of differentially expressed genes (DEGs) between each condition. Conditions include morphine fixed (FIX), morphine escalating (ESC), CCI 7dpi, SNI 7dpi, and SNT 7dpi. Each pixel represents the overlap between the transcriptome of each comparison as noted, color-coded according to the significance of overlap,  $-\log_{10}(P \text{ value})$ , of the hypergeometric overlap analysis.

(B) Heatmap of the gene overlap analysis, color-scaled according to odds ratios and including P values when significant overlap is found. Overlap analysis is performed on all comparisons for the top 10 upregulated genes at 7 dpi.

(C) Corresponding Euler plot showing overlap between conditions. Conditions are color-coded. FIX: red, ESC: yellow, SNI: white, SNT: gray, CCI: blue.

(D) Euler plot of the proliferation-associated genes identified for each condition in the top 100 upregulated genes. Conditions are color-coded. FIX: red, ESC: yellow, SNI 7dpi: white, SNT 7dpi: gray, CCI 7dpi: blue, SNT 2dpi: purple, CCI 2dpi: green.

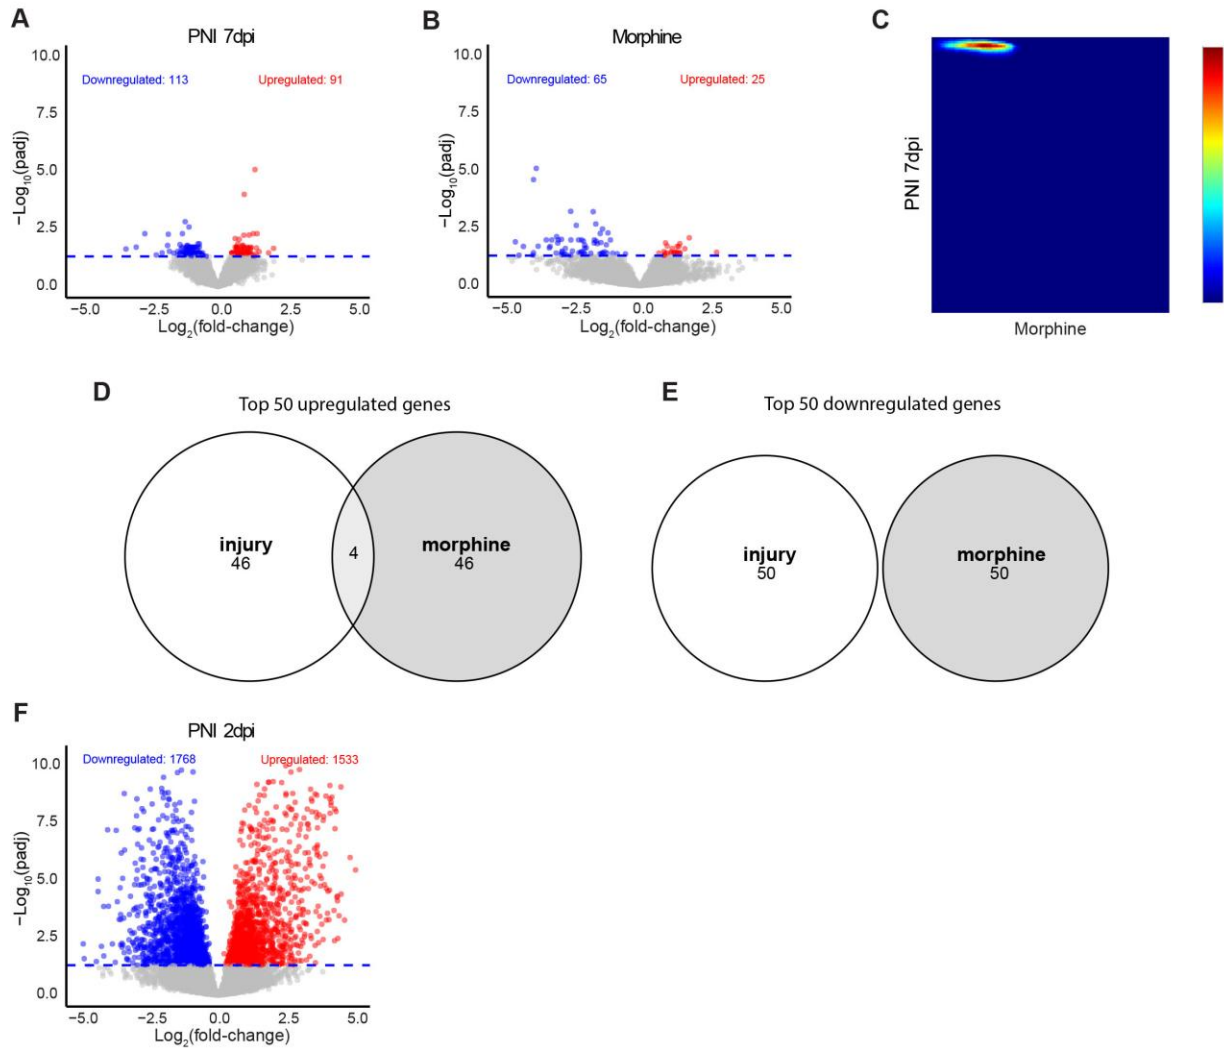

**Figure S3: Diverse transcriptional responses of spinal microglia in chronic neuropathic pain versus opioid exposure.**

(A) Volcano plots summarizing gene expression changes in microglia 7 days after PNI, with all PNI conditions pooled together. Blue and red dots indicate significantly downregulated or upregulated genes, respectively, from DESeq2 ( $\text{padj} < 0.05$ ). The numbers in the lower corners indicate the total numbers of downregulated (blue) and upregulated (red) genes at  $\text{padj} < 0.05$ .

(B) Volcano plots summarizing gene expression changes in microglia after morphine exposure, with all morphine conditions pooled together. Blue and red dots indicate significantly downregulated or upregulated genes, respectively, from DESeq2 ( $\text{padj} < 0.05$ ). The numbers in the lower corners indicate the total numbers of downregulated (blue) and upregulated (red) genes at  $\text{padj} < 0.05$ .

(C) Heatmap of the RRHO analysis showing threshold-free comparisons of DEGs between injury and morphine conditions. Each pixel represents the overlap between the transcriptome of each comparison as noted, color-coded according to the significance of overlap,  $-\log_{10}(\text{P value})$ , of the hypergeometric analysis.

(D) Euler plot of the top 50 upregulated genes for injury and morphine conditions. Conditions are color-

coded. injury: white, morphine: gray.

(E) Euler plot of the top 50 downregulated genes for injury and morphine conditions. Conditions are color-coded. injury: white, morphine: gray.

(F) Volcano plots summarizing gene expression changes in microglia 2 days after PNI, with all PNI conditions pooled together. Blue and red dots indicate significantly downregulated or upregulated genes, respectively, from DESeq2 ( $\text{padj} < 0.05$ ). The numbers in the lower corners indicate the total numbers of downregulated (blue) and upregulated (red) genes at  $\text{padj} < 0.05$ .

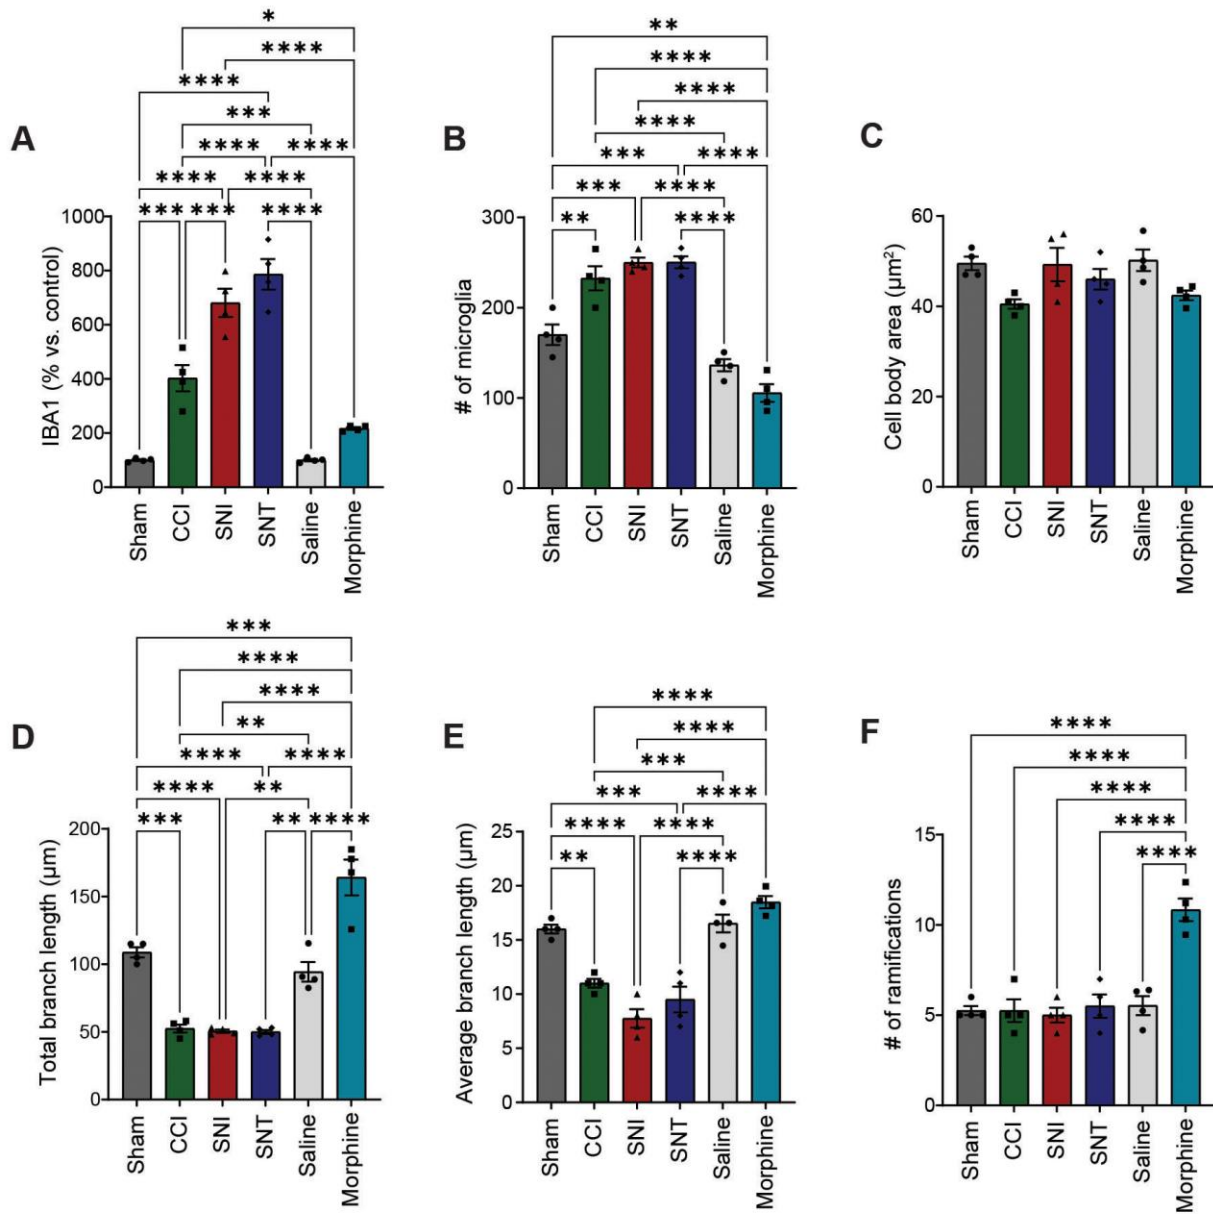

**Figure S4: Microglia display different histological and morphological signatures following PNI versus chronic morphine exposure.**

(A) Quantification of IBA1 density (% area) in the dorsal horn, normalized as % vs. control. Ipsilateral for PNI conditions, bilateral for the morphine condition. Control = sham for PNI conditions, Control = saline for the morphine condition.

(B) Quantification of the number of microglia in the dorsal horn for each condition.

(C-F) Analysis of microglia morphology, including number of ramifications, microglia body area, total branch length, and average branch length. One-way ANOVA and Holm-Sidak's test (I, N); \* indicates  $p < 0.05$ ; \*\*\*,  $p < 0.001$ ; \*\*\*\*,  $p < 0.0001$  vs. CCI, SNT, SNI, sham, saline, or morphine. Dots:  $n = 4$  mice/condition.

**A**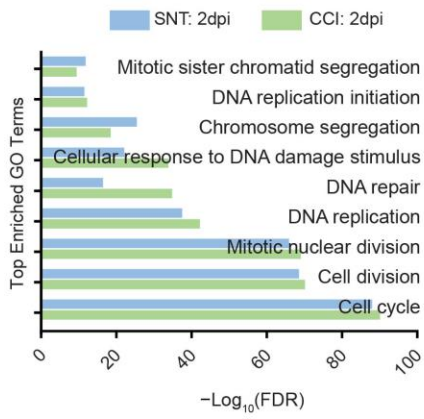**B**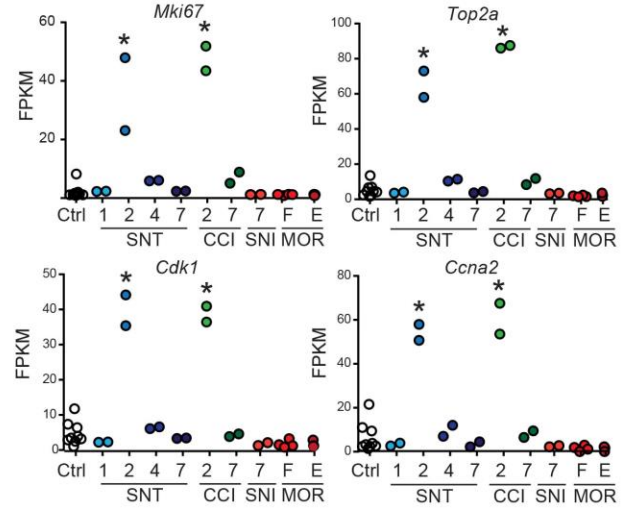**C**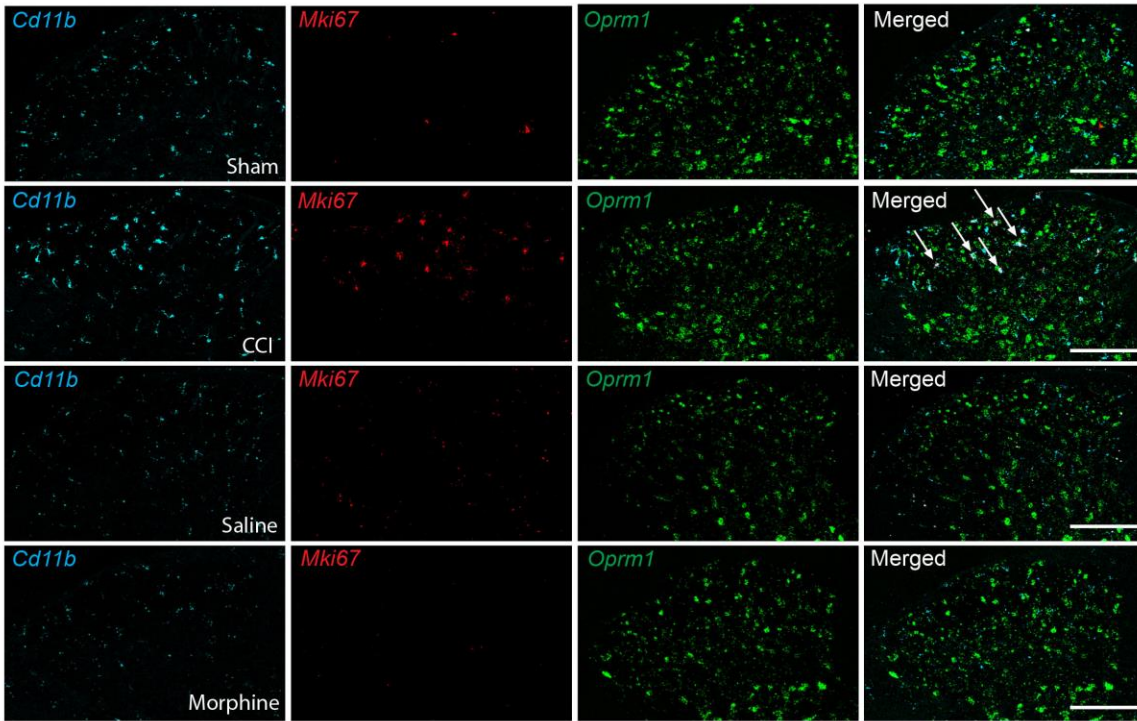**D**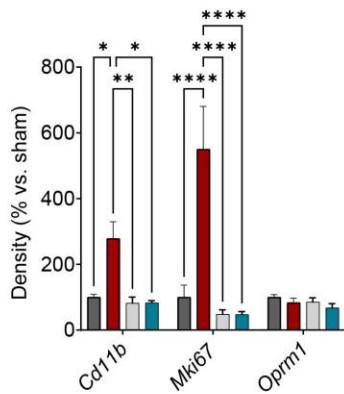**E**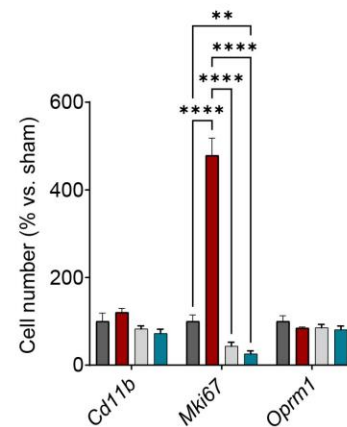

**Figure S5: Proliferation drives microglial activation following PNI but not morphine treatment.**

- (A) Top enriched GO Terms associated with SNT (blue) or CCI (green) at 2 dpi.
- (B) Time course of normalized (FPKM) expression across time and injury for genes associated with proliferation. \* Indicates significantly differentially expressed with DESeq2  $p < 0.01$  compared to relevant control groups.
- (C) Example images of spinal cord dorsal horns in situ hybridization 2 days after procedure (CCI or sham) or treatment (escalating morphine or saline). Markers include Cd11b, mKi67, Oprm1 RNAscope probes and a merge image. Scale bars = 200  $\mu\text{m}$ .
- (D) Quantification of hybridization density (% area) for each marker on the ipsilateral side. Normalization was made as % vs. control sham.
- (E) Quantification of cell number positive for each marker. Normalization was made as % vs. control sham. One-way ANOVA and Holm-Sidak's test (B, C); \* indicates  $p < 0.05$ ; \*\*,  $p < 0.01$ ; \*\*\*\*,  $p < 0.0001$  vs. sham or saline or morphine.  $n = 4$  mice.

| gene_id | baseMean | log2FoldC | lfcSE | stat | pvalue | padj |
|---------|----------|-----------|-------|------|--------|------|
|---------|----------|-----------|-------|------|--------|------|



|                   |                 |                      |          |          |          |          |
|-------------------|-----------------|----------------------|----------|----------|----------|----------|
| 1110059E2<br>4Rik | 64.681434<br>8  | -<br>1.0131173<br>71 | 0.258024 | -3.92645 | 8.62E-05 | 0.019748 |
| 1600010M<br>07Rik | 48.013624<br>56 | -<br>1.0668116<br>92 | 0.31401  | -3.39738 | 0.00068  | 0.04093  |
| 2210015D1<br>9Rik | 49.733330<br>71 | -<br>0.7834578<br>18 | 0.233917 | -3.3493  | 0.00081  | 0.044283 |
| 2810013P0<br>6Rik | 53.171944<br>82 | -<br>1.0953316<br>55 | 0.33255  | -3.29374 | 0.000989 | 0.047227 |
| 3110056K0<br>7Rik | 42.457238<br>66 | -<br>1.7579147<br>81 | 0.476972 | -3.68557 | 0.000228 | 0.03008  |
| 4933434E2<br>0Rik | 468.44794<br>07 | -<br>0.6006977<br>47 | 0.174151 | -3.44929 | 0.000562 | 0.038356 |
| 6030468B1<br>9Rik | 73.611997<br>32 | -<br>1.2657547<br>25 | 0.382222 | -3.31157 | 0.000928 | 0.046356 |
| 6330416G1<br>3Rik | 317.42514<br>46 | 0.9220803<br>06      | 0.252397 | 3.653294 | 0.000259 | 0.031092 |
| Abca1             | 686.95468<br>83 | 0.9529662<br>23      | 0.170339 | 5.594531 | 2.21E-08 | 9.92E-05 |
| Abca2             | 213.76749<br>81 | 0.7160621<br>13      | 0.190824 | 3.752476 | 0.000175 | 0.024845 |
| Acy1              | 80.689179<br>97 | -<br>0.9278986<br>45 | 0.251638 | -3.68744 | 0.000227 | 0.03008  |
| Adar              | 340.15634<br>94 | 0.4927370<br>4       | 0.13991  | 3.521809 | 0.000429 | 0.035057 |
| Adnp2             | 102.45090<br>74 | 0.8791434<br>9       | 0.247926 | 3.545993 | 0.000391 | 0.035057 |
| Afg3l2            | 178.35877<br>9  | 0.6881821<br>45      | 0.196934 | 3.494482 | 0.000475 | 0.035689 |
| AI607873          | 47.616224<br>15 | 1.0825451<br>7       | 0.331157 | 3.268982 | 0.001079 | 0.048889 |

|          |                 |                      |          |          |          |          |
|----------|-----------------|----------------------|----------|----------|----------|----------|
| Ak6      | 45.276440<br>12 | -<br>1.1909675<br>88 | 0.331635 | -3.5912  | 0.000329 | 0.035057 |
| Alkbh3   | 106.54310<br>01 | -<br>0.8736062<br>59 | 0.246173 | -3.54875 | 0.000387 | 0.035057 |
| Ano7     | 63.716858<br>66 | -<br>1.1731102<br>2  | 0.338858 | -3.46195 | 0.000536 | 0.037285 |
| Arhgap31 | 323.78165<br>61 | 1.0370545<br>98      | 0.295413 | 3.510528 | 0.000447 | 0.035057 |
| Atp13a2  | 671.96235<br>5  | 0.6781524<br>83      | 0.207733 | 3.264543 | 0.001096 | 0.0491   |
| Atp6v0a2 | 1106.7336<br>09 | 0.9304114<br>59      | 0.239526 | 3.884385 | 0.000103 | 0.021091 |
| Axl      | 448.82399<br>61 | 0.8319259<br>8       | 0.244094 | 3.408215 | 0.000654 | 0.040424 |
| BC003965 | 107.18559<br>99 | -<br>0.8525824<br>97 | 0.241258 | -3.5339  | 0.000409 | 0.035057 |
| Bcl2a1a  | 101.12349<br>08 | -<br>1.1550668<br>91 | 0.30318  | -3.80983 | 0.000139 | 0.022664 |
| Bcl2a1b  | 350.16371<br>98 | -<br>1.0086564<br>33 | 0.280738 | -3.59288 | 0.000327 | 0.035057 |
| Bcor     | 142.42964<br>94 | 0.7635054<br>24      | 0.22282  | 3.426556 | 0.000611 | 0.039997 |
| C2cd2    | 67.766721<br>73 | 1.2030298<br>72      | 0.3482   | 3.455    | 0.00055  | 0.037945 |
| C2cd2l   | 98.256898<br>66 | 1.0722761<br>56      | 0.308695 | 3.473576 | 0.000514 | 0.036537 |
| Calm2    | 2282.3499<br>31 | -<br>0.6495880<br>38 | 0.19348  | -3.3574  | 0.000787 | 0.043931 |
| Capg     | 475.60757<br>95 | -<br>0.8882722<br>23 | 0.226807 | -3.91643 | 8.99E-05 | 0.019748 |

|         |                 |                      |          |          |          |          |
|---------|-----------------|----------------------|----------|----------|----------|----------|
| Cask    | 241.30759<br>84 | -<br>0.7122183<br>55 | 0.203855 | -3.49375 | 0.000476 | 0.035689 |
| Ccdc115 | 214.30219<br>55 | -<br>0.7552512<br>13 | 0.224829 | -3.35922 | 0.000782 | 0.043931 |
| Ccl6    | 1091.7351<br>62 | -<br>1.0485549<br>98 | 0.215679 | -4.86165 | 1.16E-06 | 0.002609 |
| Ccl9    | 742.16076<br>22 | -<br>1.0310976<br>1  | 0.281171 | -3.66715 | 0.000245 | 0.030966 |
| Cd22    | 52.165071<br>12 | 1.2070148<br>49      | 0.353793 | 3.411638 | 0.000646 | 0.040424 |
| Cd9     | 2846.6046<br>31 | -<br>0.6586501<br>99 | 0.201177 | -3.27398 | 0.00106  | 0.048889 |
| Cfl2    | 102.93847<br>85 | -<br>0.6616505<br>62 | 0.196135 | -3.37344 | 0.000742 | 0.043296 |
| Chchd1  | 75.451983<br>23 | -<br>1.0765068<br>38 | 0.31718  | -3.394   | 0.000689 | 0.041163 |
| Chst2   | 82.749552<br>61 | 2.0161043<br>5       | 0.52713  | 3.824683 | 0.000131 | 0.022322 |
| Cklf    | 141.67443<br>33 | -<br>1.1244629<br>22 | 0.317177 | -3.54522 | 0.000392 | 0.035057 |
| Cks2    | 41.727141<br>94 | -<br>1.2819508<br>14 | 0.36431  | -3.51884 | 0.000433 | 0.035057 |
| Clec4d  | 139.42195<br>46 | -<br>2.9620856<br>8  | 0.742229 | -3.9908  | 6.59E-05 | 0.019748 |
| Clec5a  | 897.20133<br>11 | -<br>0.5535356<br>4  | 0.155891 | -3.55079 | 0.000384 | 0.035057 |

**Table S1: Differentially expressed genes after nerve injury.**

| <b>gene_id</b>    | <b>baseMean</b> | <b>log2FoldC<br/>hange</b> | <b>lfcSE</b> | <b>stat</b> | <b>pvalue</b> | <b>padj</b> |
|-------------------|-----------------|----------------------------|--------------|-------------|---------------|-------------|
| 1600010M<br>07Rik | 77.2284118<br>5 | 1.23506575<br>9            | 0.3335235    | 3.703085    | 0.000213      | 0.038849    |
| AB124611          | 103.277683<br>5 | -<br>1.18619714<br>2       | 0.3203603    | -3.7027     | 0.000213      | 0.038849    |
| Abca7             | 183.398529<br>9 | -<br>0.97924008<br>7       | 0.2673556    | -3.66269    | 0.00025       | 0.03979     |
| Acap1             | 65.3554991<br>9 | -<br>2.13772720<br>3       | 0.5824726    | -3.67009    | 0.000242      | 0.039714    |
| Acpp              | 19.2707665<br>6 | -<br>2.96756770<br>7       | 0.7158614    | -4.14545    | 3.39E-05      | 0.01405     |
| Adam8             | 137.356093<br>2 | -<br>2.08828243            | 0.5495513    | -3.79998    | 0.000145      | 0.034323    |
| Anxa2             | 388.106847      | -<br>1.44597348            | 0.3972289    | -3.64015    | 0.000272      | 0.041769    |
| Aqp9              | 18.7645557<br>7 | -<br>2.73271773<br>3       | 0.7527931    | -3.6301     | 0.000283      | 0.042338    |

|                   |                 |                      |           |          |          |          |
|-------------------|-----------------|----------------------|-----------|----------|----------|----------|
| Atp6v1f           | 763.010611<br>7 | 1.13094055<br>3      | 0.3034881 | 3.726475 | 0.000194 | 0.038062 |
| AW112010          | 119.928273<br>5 | 1.29442101<br>8      | 0.3443811 | 3.758688 | 0.000171 | 0.03647  |
| B430306N<br>03Rik | 106.594376<br>4 | -<br>1.34752162<br>9 | 0.2852753 | -4.72358 | 2.32E-06 | 0.003463 |
| Bola3             | 49.8225694<br>6 | 1.79580106<br>7      | 0.4030983 | 4.454996 | 8.39E-06 | 0.008359 |
| Bst1              | 27.1216774<br>1 | -<br>2.81128488<br>8 | 0.732149  | -3.83977 | 0.000123 | 0.031975 |
| C3                | 262.745391      | -<br>2.10567857<br>8 | 0.4881515 | -4.31358 | 1.61E-05 | 0.010339 |
| Cbr1              | 123.590767<br>7 | 0.69452660<br>9      | 0.188094  | 3.692444 | 0.000222 | 0.039055 |
| Ccna2             | 50.1417224<br>9 | -<br>2.00106316<br>6 | 0.5505856 | -3.63443 | 0.000279 | 0.042167 |
| Cd177             | 843.296306      | -<br>1.41162623<br>4 | 0.3920553 | -3.60058 | 0.000318 | 0.045196 |
| Cdc25b            | 22.5811426<br>3 | -<br>2.95047487<br>6 | 0.6811514 | -4.3316  | 1.48E-05 | 0.010339 |
| Chdh              | 4.03533526<br>2 | -<br>4.21253581<br>7 | 1.0505243 | -4.00994 | 6.07E-05 | 0.019936 |
| Chst13            | 8.04763985<br>4 | -<br>4.50461896<br>3 | 1.0716457 | -4.20346 | 2.63E-05 | 0.012572 |
| Cldn15            | 29.7981188<br>5 | -<br>2.21076109<br>8 | 0.5922126 | -3.73305 | 0.000189 | 0.038062 |
| Cybb              | 676.408834<br>9 | -<br>1.34015622<br>2 | 0.3648782 | -3.67289 | 0.00024  | 0.039714 |

|          |                 |                      |           |          |          |          |
|----------|-----------------|----------------------|-----------|----------|----------|----------|
| E2f8     | 14.6534326<br>2 | -<br>3.84684294<br>9 | 0.6540803 | -5.8813  | 4.07E-09 | 2.43E-05 |
| Emilin2  | 108.081522<br>6 | -<br>1.99806767<br>9 | 0.5081715 | -3.93188 | 8.43E-05 | 0.023995 |
| Gpsm2    | 12.9718793<br>8 | -<br>3.67922597<br>4 | 0.914216  | -4.02446 | 5.71E-05 | 0.019509 |
| Gsn      | 265.824446      | -<br>1.20916321<br>1 | 0.2964488 | -4.07883 | 4.53E-05 | 0.016913 |
| Gsto1    | 152.808238<br>6 | 0.99686139           | 0.2468748 | 4.037923 | 5.39E-05 | 0.018965 |
| Hax1     | 137.767656<br>8 | 0.88059450<br>7      | 0.2305788 | 3.819061 | 0.000134 | 0.03337  |
| Hbs1l    | 106.486631<br>1 | -<br>0.81271429<br>7 | 0.2232557 | -3.64029 | 0.000272 | 0.041769 |
| Hgf      | 10.5414876<br>1 | -<br>2.81034203<br>8 | 0.785353  | -3.57844 | 0.000346 | 0.047978 |
| Ifit1bl2 | 10.4594992      | -<br>3.27571240<br>4 | 0.8283868 | -3.95433 | 7.68E-05 | 0.022943 |
| Ifitm1   | 33.9932253<br>7 | -<br>2.69143395      | 0.6861646 | -3.92243 | 8.77E-05 | 0.024375 |
| Il1f9    | 74.9911085<br>3 | -<br>2.83500164<br>5 | 0.6438079 | -4.40349 | 1.07E-05 | 0.009798 |
| Iqgap1   | 260.643829<br>8 | -<br>1.42970253<br>3 | 0.3118645 | -4.58437 | 4.55E-06 | 0.005445 |
| Irf7     | 75.7168031<br>5 | -<br>1.27310624<br>9 | 0.3352837 | -3.7971  | 0.000146 | 0.034323 |
| Kif20a   | 22.4399337<br>8 | -<br>2.21559828      | 0.5127256 | -4.32122 | 1.55E-05 | 0.010339 |

|       |                 |                      |           |          |          |          |
|-------|-----------------|----------------------|-----------|----------|----------|----------|
| Kndc1 | 13.7800345<br>6 | 2.78680320<br>6      | 0.7397177 | 3.767388 | 0.000165 | 0.035863 |
| Kntc1 | 10.7464973<br>8 | -<br>2.66754622<br>4 | 0.7392645 | -3.60838 | 0.000308 | 0.044863 |
| Larp7 | 113.140584<br>6 | 1.35647281           | 0.3389124 | 4.00243  | 6.27E-05 | 0.019936 |
| Ltf   | 4393.50788<br>9 | -<br>1.64385660<br>5 | 0.3824976 | -4.29769 | 1.73E-05 | 0.010339 |
| Ly75  | 22.6785928<br>2 | -<br>3.74736848<br>3 | 0.6068458 | -6.17516 | 6.61E-10 | 7.90E-06 |
| Mefv  | 19.4772630<br>6 | -<br>3.38359763<br>7 | 0.7884753 | -4.29132 | 1.78E-05 | 0.010339 |
| Megf9 | 62.0012820<br>2 | -<br>2.13306152<br>3 | 0.5627186 | -3.79064 | 0.00015  | 0.034552 |

**Table S2: Differentially expressed genes after morphine treatment.**
